# Supplementary material
Source: PubMed Central journal article supplement (PMC9185030)
Supplement: ajtr0014-3381-f7.pdf [file ajtr0014-3381-f7.pdf]

## IL-4 and CCR7 of keloids with a family history

**Supplementary Table 1.** Clinical characteristics of keloid's patients

| Patients | Age of onset (years) | Gender | mVSS |
|----------|----------------------|--------|------|
| N1       | 20                   | male   | 8    |
| N2       | 23                   | female | 8    |
| N3       | 23                   | male   | 6    |
| N24      | 40                   | female | 7    |
| N54      | 32                   | male   | 6    |
| N56      | 28                   | male   | 9    |
| N60      | 33                   | female | 10   |
| N71      | 29                   | male   | 11   |
| N98      | 42                   | female | 11   |
| FN1      | 26                   | male   | 12   |
| FN2      | 42                   | female | 13   |
| FN3      | 23                   | female | 11   |
| FN4      | 36                   | female | 14   |
| FN36     | 30                   | male   | 10   |
| FN55     | 28                   | male   | 9    |
| FN58     | 41                   | female | 13   |
| FN68     | 20                   | female | 15   |
